# Supplementary material for: Modulation of Gut Barrier Functions in Ulcerative Colitis by Hyaluronic Acid System
Source: PubMed Central journal article supplement (PMC8811821; doi:10.1002/advs.202103189), 2021-11-10
Supplement: ADVS-9-2103189-s001.pdf [file ADVS-9-2103189-s001.pdf]

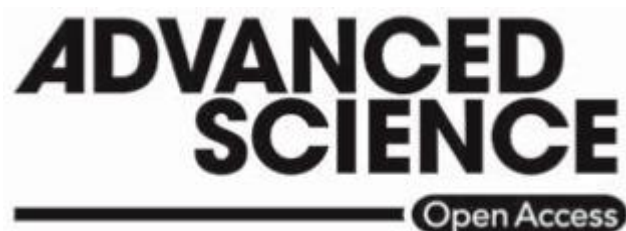

## Supporting Information

for *Adv. Sci.*, DOI: 10.1002/adv.202103189

Modulation of gut barrier functions in ulcerative colitis by  
hyaluronic acid system

*Niranjan G. Kotla, Isma Liza Mohd Isa, Swetha Rasala, Secil Demir, Rajbir Singh, Becca V. Baby, Samantha K. Swamy, Peter Dockery, Venkatakrishna R. Jala, Yury Rochev\*, Abhay Pandit\**

## SUPPLEMENTARY INFORMATION

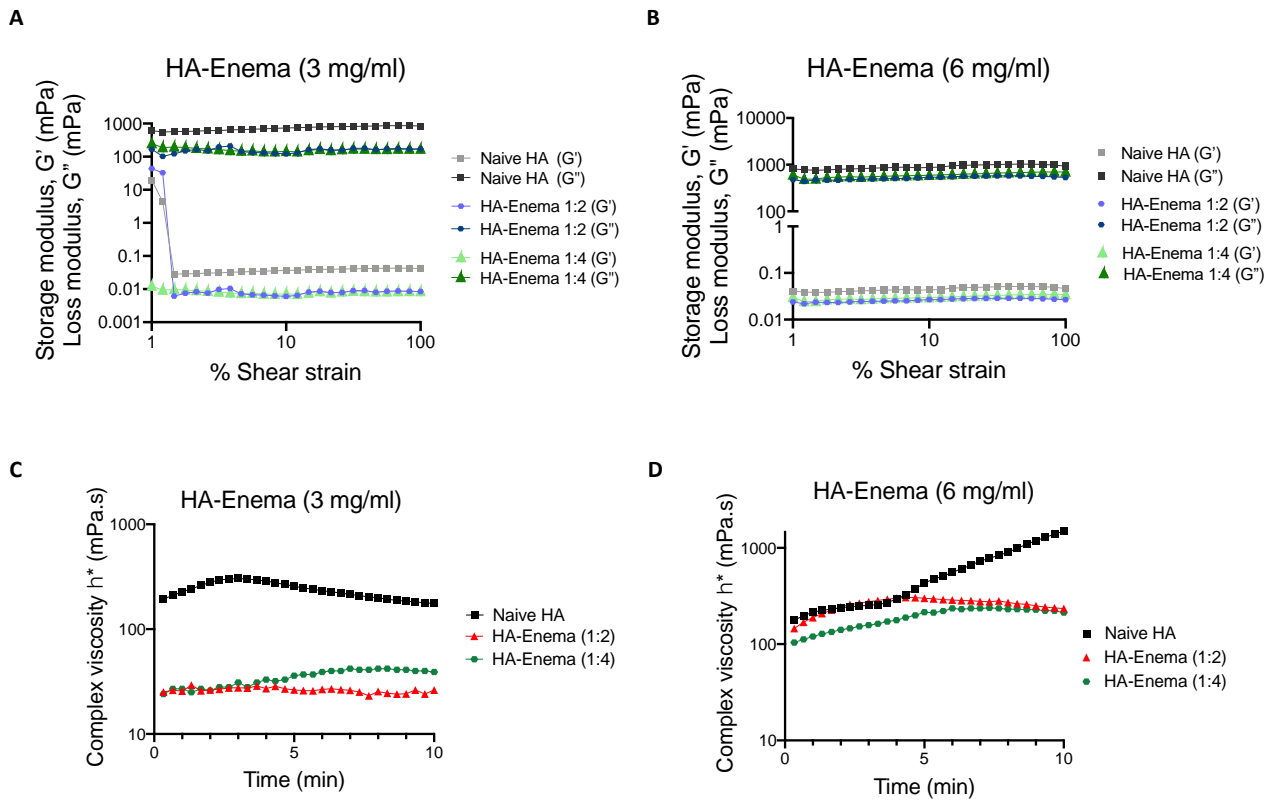

**Figure. S1. Rheological measurements of Naïve HA and HA- enema suspension system.**

(A, B) Storage modulus ( $G'$ ), loss modulus ( $G''$ ) and complex viscosity ( $\eta^*$ ) values for 3 mg/ml formulations of Naïve HA, HA-enema (1:2) and HA-suspension (1:4) solutions over a percent shear strain range of 1-100% and time sweep respectively. (C, D) Storage modulus ( $G'$ ), loss modulus ( $G''$ ) and complex viscosity ( $\eta^*$ ) values for 6 mg/mL formulations of Naïve HA, HA-enema (1:2) and HA-enema (1:4) solutions over a percent shear strain range of 1-100% and time sweep respectively.

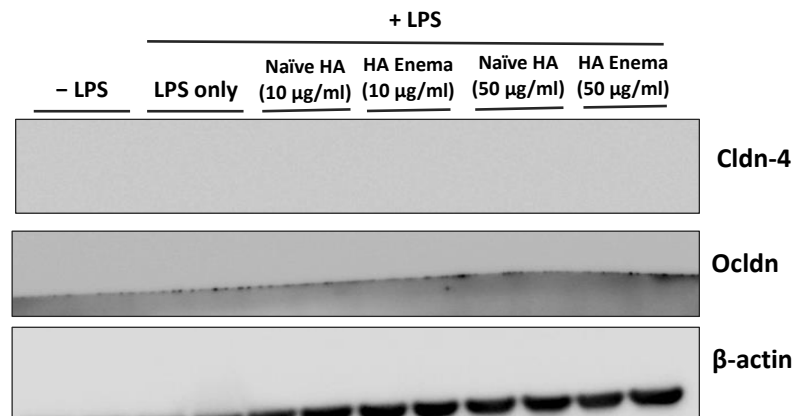

**Figure S2. Effect of Naïve HA and HA-enema treatment on Caco-2 cells.** Monolayer Caco-2 cells were treated with Naïve HA and HA-enema (10, 50 µg/mL) for 24 hrs followed by treatment with LPS (50 ng/ml) for two hrs. Naïve HA and HA-enema moderately induced protein expression of Cldn4, Ocldn in Caco-2 cells was determined by immunoblots.

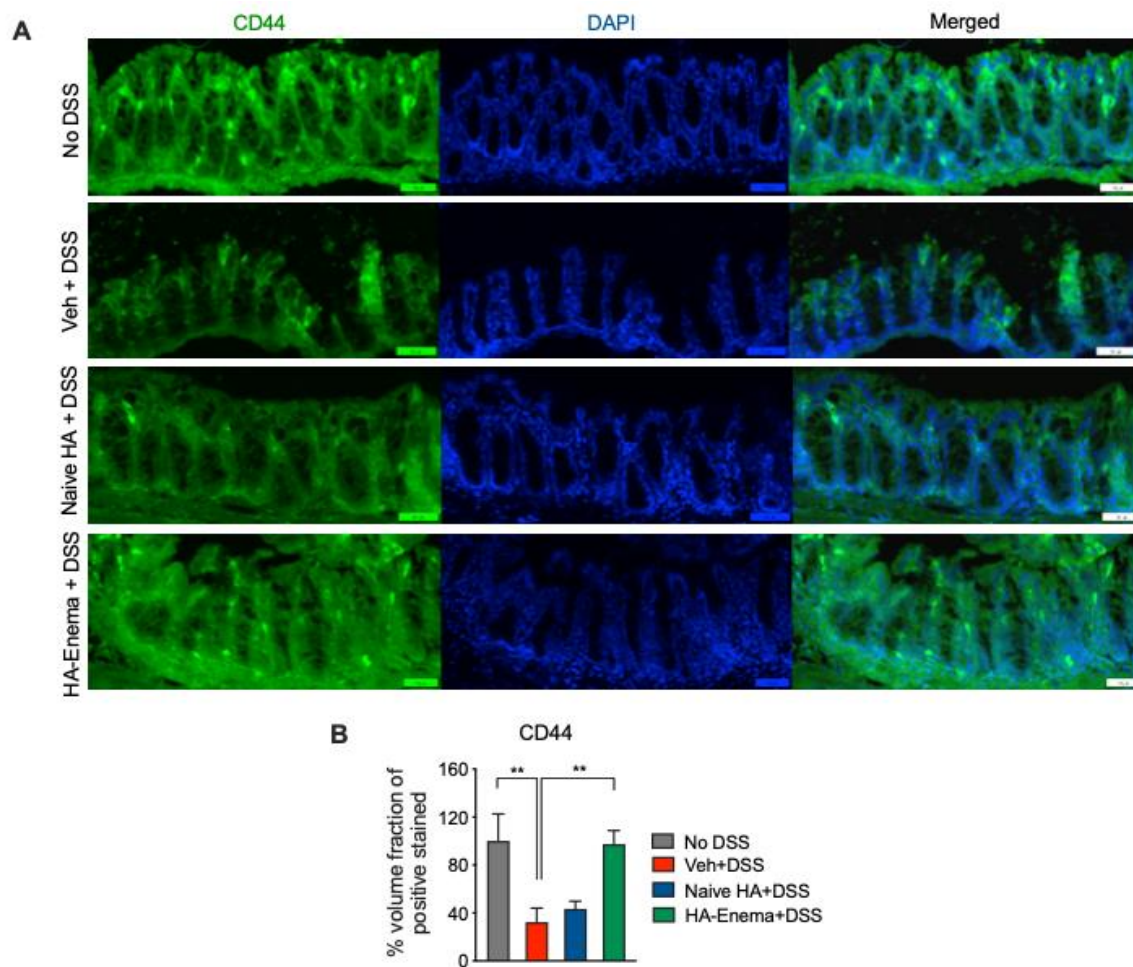

**Figure S3. Proteomic changes (surface receptor) underlying intestinal epithelial layer following colitis induction and HA treatments.** Representative immunofluorescence images showing presence of epithelial surface receptor CD44 at the colitis epithelial wall in HA-treated groups compared to vehicle (PBS) control group (A) and % volume fraction of the staining (B). Statistical analysis was performed using GraphPad Prism software by one-way ANOVA with Dunnett's multiple comparisons test, data were expressed as the mean  $\pm$  SEM. \* $p < 0.05$ . Scale bar 50  $\mu$ m.

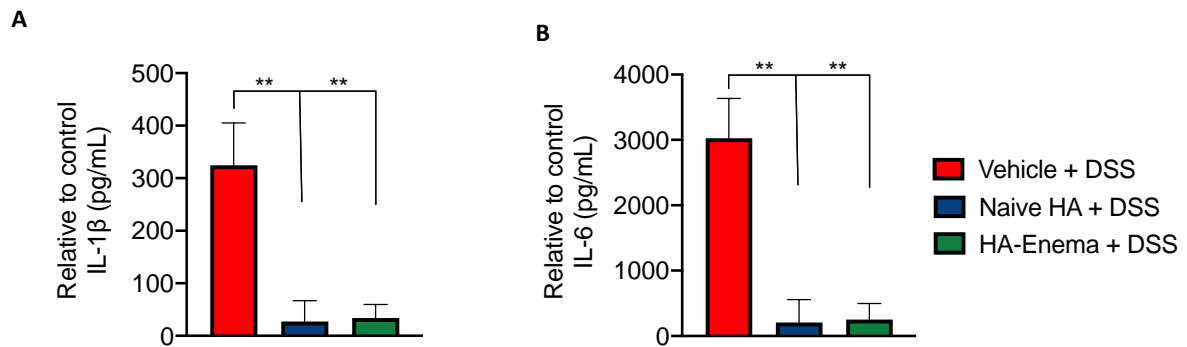

**Figure S4. Proteomic changes (inflammatory markers) underlying intestinal epithelial layer following colitis induction and HA treatments.** (A, B) Levels of IL-1 $\beta$  and IL-6 from the protein lysate of DSS colitis tissue after Naïve NA and HA-enema treatment. Statistical analysis was performed using GraphPad Prism software by one-way ANOVA with Dunnett's multiple comparisons test, data were expressed as the mean  $\pm$  SEM. \*\*p < 0.01.
